# Supplementary material for: Contributions of the Right Prefrontal and Parietal Cortices to the Attentional Blink: A tDCS Study
Source: MDPI journal article supplement (doi:10.3390/sym13071208), 2021-07-06
Supplement: s1 [file s1]

Supplementary Materials: Boxplots for overall performance on T2 during sham tDCS for the whole sample (top) and for poor and good performers (bottom)

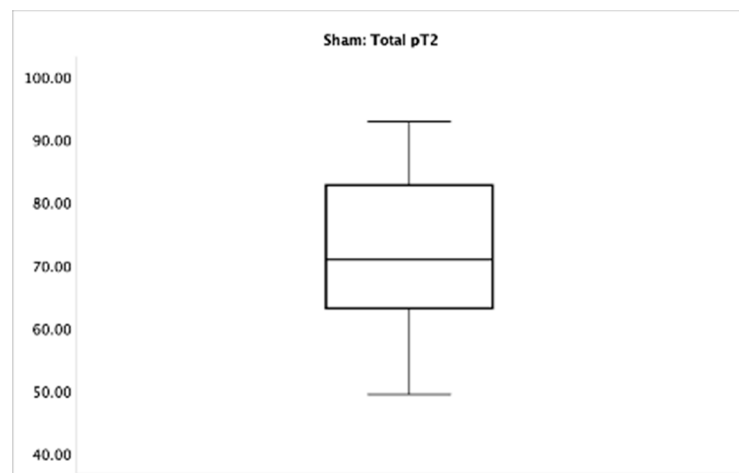

Figure S1. Overall Performance on T2 (Total pT2) during sham tDCS

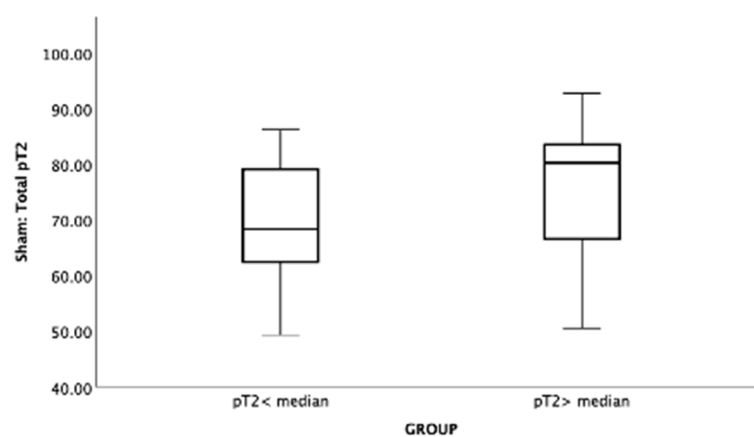

Figure S2. Overall Performance on T2 (Total pT2) during sham tDCS for the two groups (poor and good performers) based on median split.
