# Supplementary material for: Contributions of the Right Prefrontal and Parietal Cortices to the Attentional Blink: A tDCS Study
Source: MDPI journal article supplement (doi:10.3390/sym13071208), 2021-07-06
Supplement: s1 [file s1]

Archive with 1 entries (1 files):
- symmetry-1265863-supplementary.pdf
